# Supplementary material for: S Trimer Derived from SARS-CoV-2 B.1.351 and B.1.618 Induced Effective Immune Response against Multiple SARS-CoV-2 Variants
Source: MDPI journal article supplement (doi:10.3390/vaccines11010193), 2023-01-16
Supplement: s1 [file s1]

**Supplementary Table 1.** Proteins used for ELISA

| Name             | Source         | Identifier       |
|------------------|----------------|------------------|
| S1-D614G         | Novoprotein    | Cat#DRA57        |
| E484K RBD        | Novoprotein    | Cat#DRA134       |
| N501Y RBD        | Novoprotein    | Cat#DRA120       |
| Gamma RBD        | Novoprotein    | Cat#DRA144       |
| Beta RBD         | Novoprotein    | Cat#DRA194       |
| Delta RBD        | SinoBiological | Cat#40592-V08H90 |
| Omicron S trimer | Novoprotein    | Cat#DRA125       |
